# Supplementary material for: Immunogenicity and Safety of Half-Dose Heterologous mRNA-1273 Booster Vaccination for Adults Primed with the CoronaVac® and ChAdOx1-S Vaccines for SARS-CoV-2
Source: MDPI journal article supplement (doi:10.3390/vaccines12040344), 2024-03-22
Supplement: s1 [file s1]

## Supplementary 1. Gating strategy for intracellular cytokine staining (ICS).

### Gating Strategy

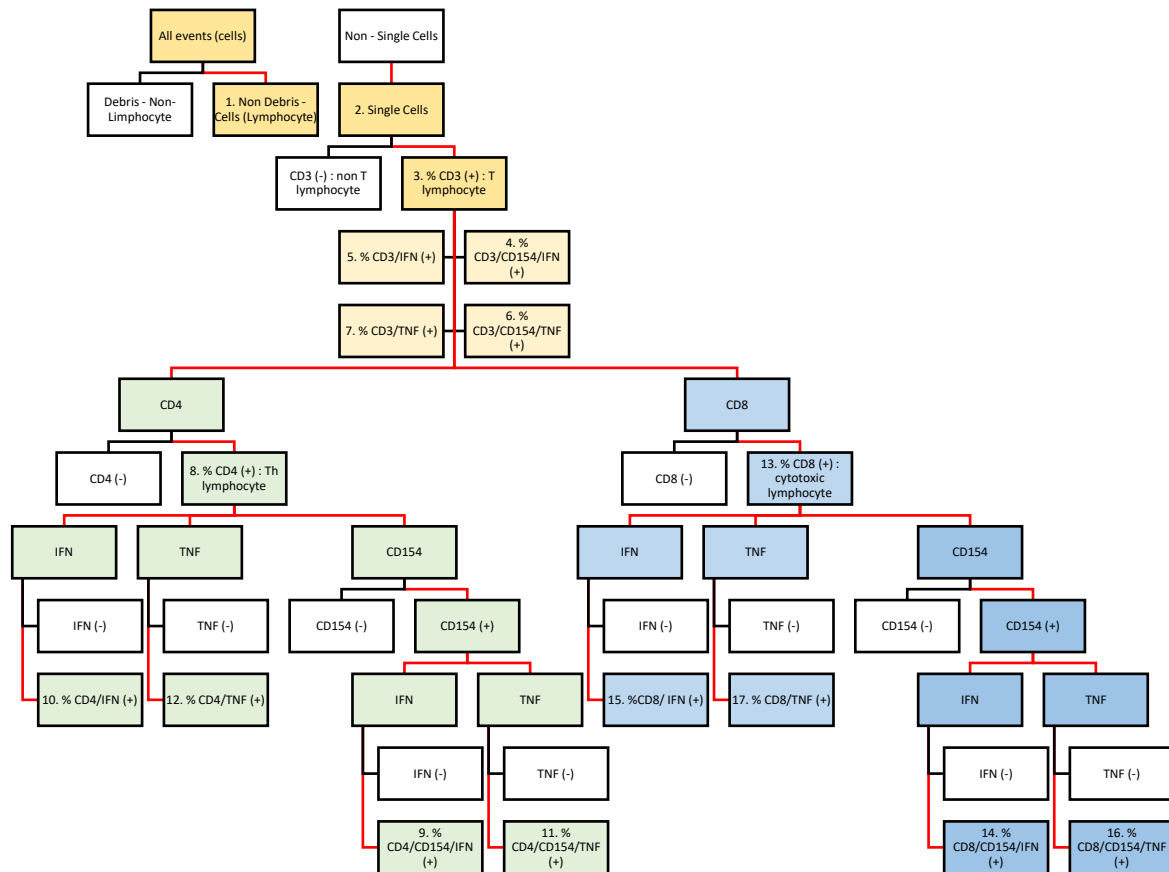

### Output in percentage :

1. Non Debris – Cell (Lymphocytes)
2. Single Cells
3. % CD3 (+) & Viable % T Lymphocytes
4. % CD3+/CD154+/IFN+ (Q2)
5. % CD3+/IFN+
6. % CD3+/CD154+/TNF+ (Q6)
7. % CD3+/TNF+
8. % CD3+/CD4+
9. % CD3+/CD4+/CD154+/IFN+ (Q2)
10. CD3+/CD4+/IFN+
11. CD3+/CD4+/CD154+/TNF+ (Q6)
12. CD3+/CD4+/TNF+

13. % CD3+/CD8+
14. % CD3+/CD8+/CD154+/IFN+
15. % CD3+/CD8+/IFN+
16. % CD3+/CD8+/CD154+/TNF+
17. % CD3+/CD8+/TNF+

|   |                                 |                                                                                                                                               |
|---|---------------------------------|-----------------------------------------------------------------------------------------------------------------------------------------------|
| 1 | Non Debris – Cell (Lymphocytes) | 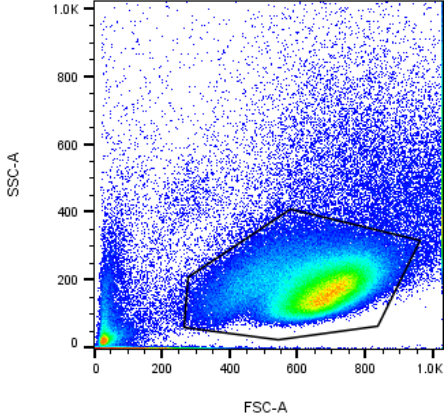 <p>01-09-2022_AIM P06.fcs<br/>Ungated<br/>306477</p>       |
| 2 | Single Cells                    |  <p>01-09-2022_AIM P06.fcs<br/>Lymphocytes<br/>216353</p> |

|           |                                                                                                                                    |                                                                                                                                               |
|-----------|------------------------------------------------------------------------------------------------------------------------------------|-----------------------------------------------------------------------------------------------------------------------------------------------|
| <p>3.</p> | <p>% CD3 (+) &amp; Viable</p> <p>Marker :<br/>CD3 : APC<br/>Viable : Pacific Blue</p>                                              | 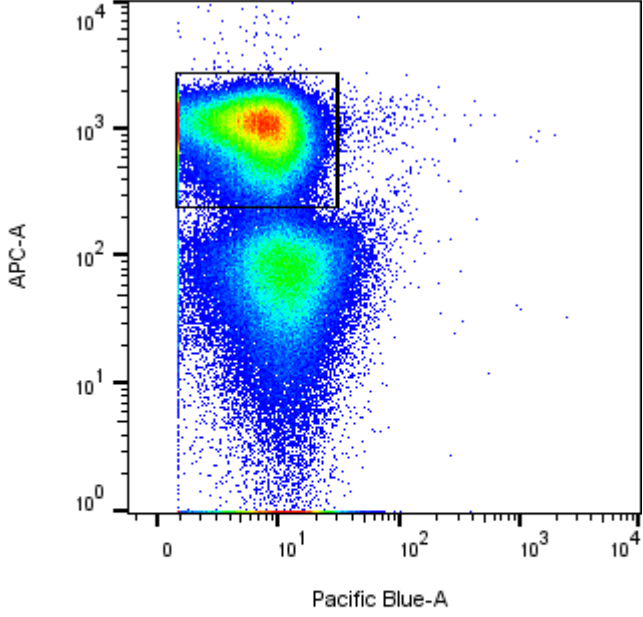 <p>01-09-2022_AIM P06.fcs<br/>Single Cells<br/>214887</p>  |
| <p>4</p>  | <p>% CD3+/CD154+/IFN+ (Q2)</p> <p>Marker :<br/>CD154 : APC Cy.7<br/>IFN gamma : PE</p> <p>Graphic type :<br/>Quadrant dot plot</p> |  <p>01-09-2022_AIM P06.fcs<br/>CD3+ Viable<br/>137083</p> |

|           |                                                                                           |                                                                                                                                               |
|-----------|-------------------------------------------------------------------------------------------|-----------------------------------------------------------------------------------------------------------------------------------------------|
| <p>5</p>  | <p>% CD3+/IFN+</p> <p>Marker :<br/>IFN Gamma : PE</p> <p>Graphic type :<br/>Histogram</p> | 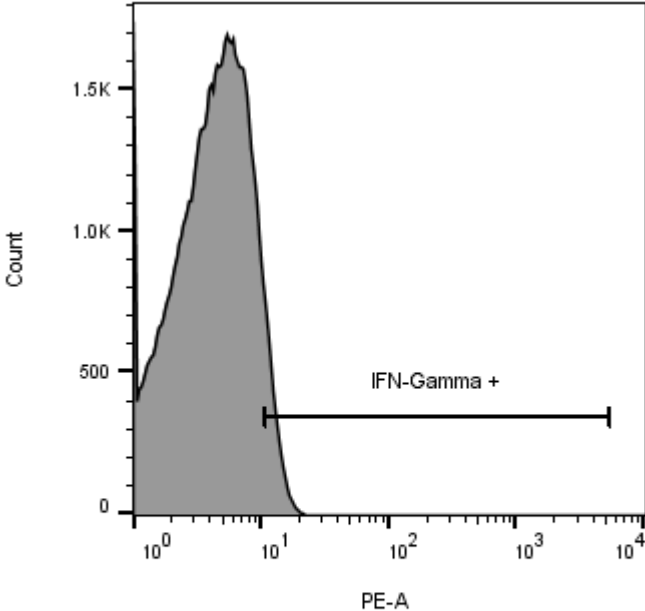 <p>01-09-2022_AIM P06.fcs<br/>CD3+ Viable<br/>137083</p>   |
| <p>6.</p> | <p>% CD3+/CD154+/TNF+ (Q6)</p> <p>Marker :<br/>TNF : PE Cy.7</p>                          |  <p>01-09-2022_AIM P06.fcs<br/>CD3+ Viable<br/>137083</p> |

|    |                                                   |                                                                                                                                               |
|----|---------------------------------------------------|-----------------------------------------------------------------------------------------------------------------------------------------------|
| 7. | <p>% CD3+/TNF+</p>                                | 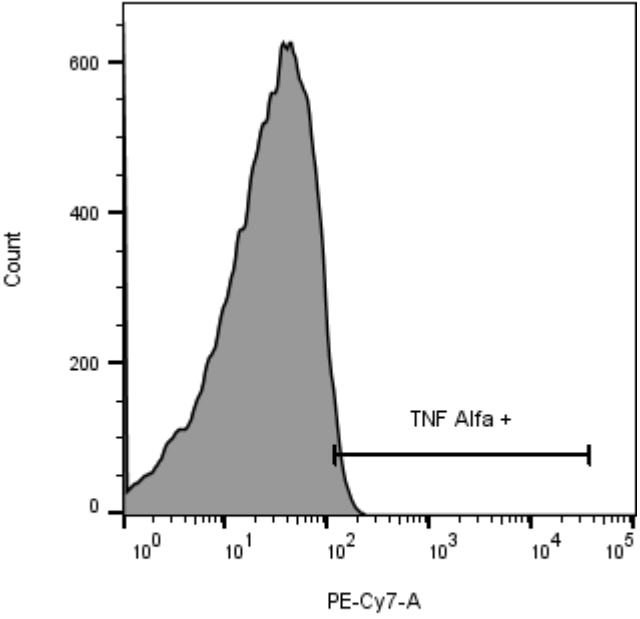 <p>01-09-2022_AIM P06.fcs<br/>CD3+ Viable<br/>137083</p>   |
| 8. | <p>% CD3+/CD4+</p> <p>Marker :<br/>CD4 : FITC</p> |  <p>01-09-2022_AIM P06.fcs<br/>CD3+ Viable<br/>137083</p> |

|    |                              |                                                                                                                                       |
|----|------------------------------|---------------------------------------------------------------------------------------------------------------------------------------|
| 9. | % CD3+/CD4+/CD154+/IFN+ (Q2) | 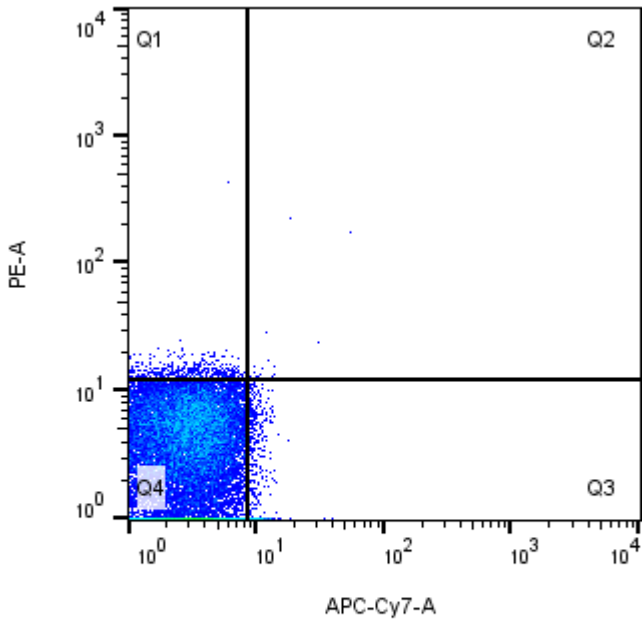 <p>01-09-2022_AIM P06.fcs<br/>CD4+<br/>75158</p>   |
| 10 | CD3+/CD4+/IFN+               |  <p>01-09-2022_AIM P06.fcs<br/>CD4+<br/>75158</p> |

|    |                            |                                                                                                                                       |
|----|----------------------------|---------------------------------------------------------------------------------------------------------------------------------------|
| 11 | CD3+/CD4+/CD154+/TNF+ (Q6) | 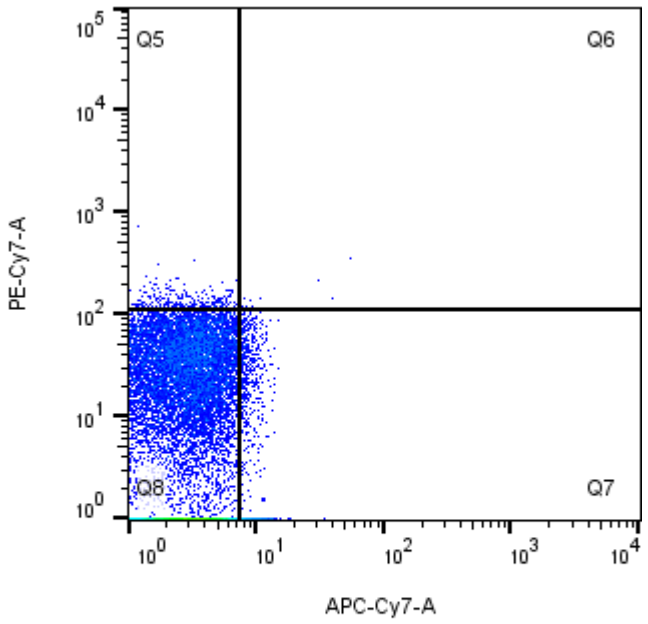 <p>01-09-2022_AIM P06.fcs<br/>CD4+<br/>75158</p>   |
| 12 | CD3+/CD4+/TNF+             |  <p>01-09-2022_AIM P06.fcs<br/>CD4+<br/>75158</p> |

|    |                                                        |                                                                                                                                             |
|----|--------------------------------------------------------|---------------------------------------------------------------------------------------------------------------------------------------------|
| 13 | <p>% CD3+/CD8+</p> <p>Marker :</p> <p>CD8 : Amcyan</p> | 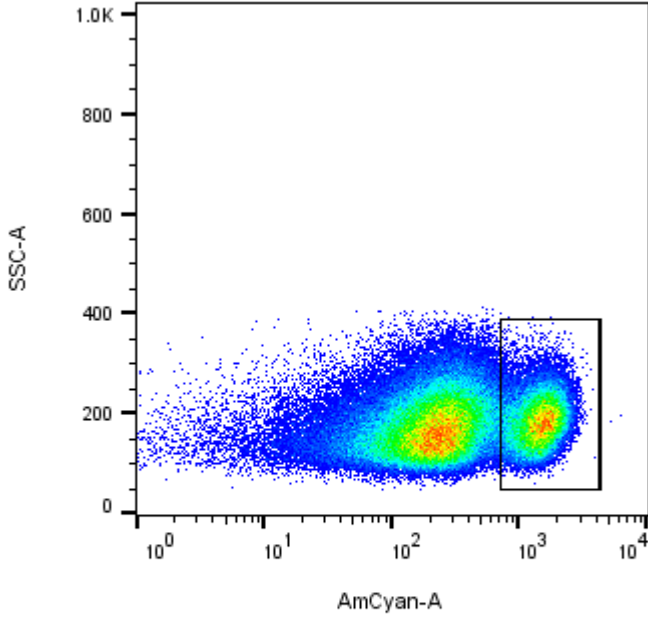 <p>01-09-2022_AIM P06.fcs<br/>CD3+ Viable<br/>137083</p> |
| 14 | <p>% CD3+/CD8+/CD154+/IFN+</p>                         |  <p>01-09-2022_AIM P06.fcs<br/>CD8+<br/>34030</p>       |



|    |                         |                                                                                                                                       |
|----|-------------------------|---------------------------------------------------------------------------------------------------------------------------------------|
| 15 | % CD3+/CD8+/IFN+        | 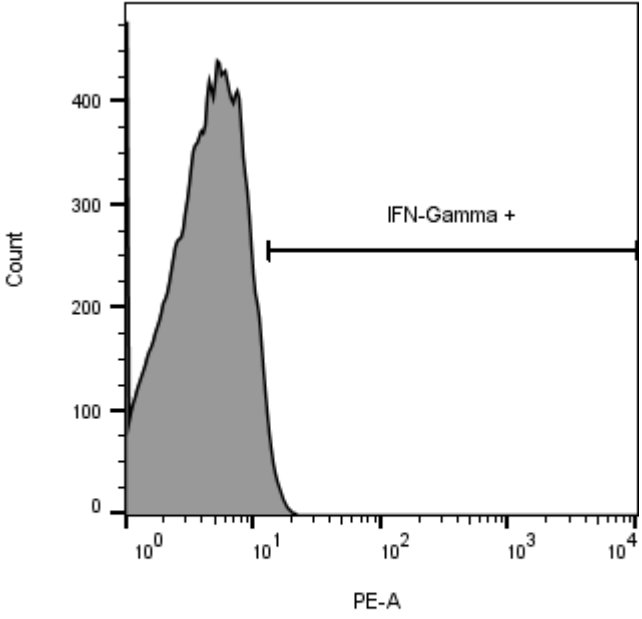 <p>01-09-2022_AIM P06.fcs<br/>CD8+<br/>34030</p>   |
| 16 | % CD3+/CD8+/CD154+/TNF+ |  <p>01-09-2022_AIM P06.fcs<br/>CD8+<br/>34030</p> |

17

% CD3+/CD8+/TNF+

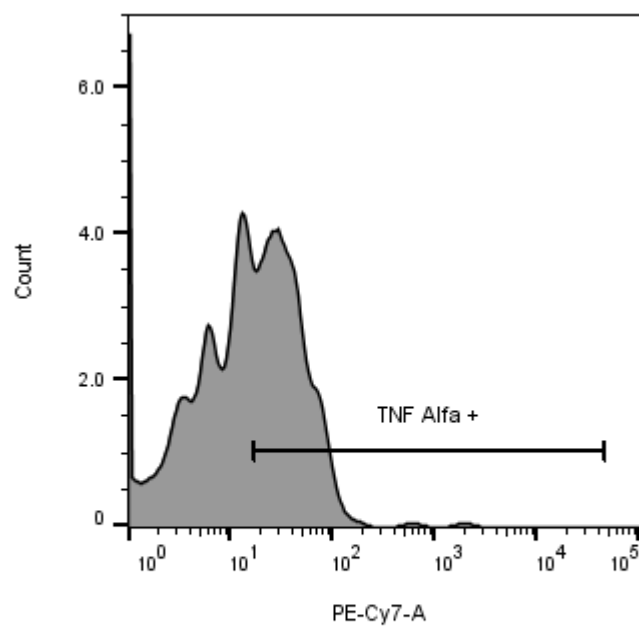

01-09-2022\_AIM P06.fcs  
CD8+  
34030
